# Supplementary material for: MYADM controls endothelial barrier function through ERM-dependent regulation of ICAM-1 expression
Source: PubMed Central journal article supplement — Mol Biol Cell. 2013 Feb 15;24(4):483–94. doi: 10.1091/mbc.E11-11-0914 (PMC3571871; doi:10.1091/mbc.e11-11-0914), 2013-02-15

**Supplementary Figure 1.** HUVECs were transfected with MYADM-GFP for 48 h, fixed and stained for PECAM-1 (A), the adherens junction markers  $\beta$ -catenin and p120-catenin (B) the tight junction marker occludin (C) and nectin-2 (D).

**Supplementary Figure 2.** HUVECs were transfected with the indicated siRNAs for 72 h, fixed (see materials and methods) and stained for total actin with anti-actin antibody, or for F-actin with TRITC-phalloidin. The F-actin/total actin ratio of three different experiments are shown in Figure 2F.

**Supplementary Figure 3.** HUVECs were transfected with the indicated siRNAs for 72 h, lysed and subjected to pulldown assay to analyse active, GTP-loaded Rac1 and Cdc42 (A) or active, GTP-loaded RhoA (B). (C) Western blot analysis of phosphorylated Ser-19 of MLC (pMLC) in siRNA transfected cells. The right graph show the mean + SEM from three independent experiments.

**Supplementary Figure 4.** HUVECs were transfected with the indicated siRNAs for 72 h, lysed and subjected to immunoprecipitation assays with a control IgG antibody or anti-VE-cadherin antibody. Lysates (input) and immunoprecipitates were immunoblotted with the indicated antibodies. Right graphs show quantitations of phosphorylated (pTyr)-VE-cadherin/total VE-cadherin ratio and of  $\beta$ -catenin association with VE-cadherin immunoprecipitates. Graphs show the mean + SEM from two independent experiments.

**Supplementary Figure 5.** Effect of single knockdown of ezrin, radixin and moesin on ERM and ICAM-1 protein expression. (A) HUVECs were transfected with the indicated siRNAs for 72 h and blotted with antibodies specific for ezrin, radixin and moesin. (B) Quantitation of the effect of siRNAs for ezrin, radixin and moesin on their respective targets. The mean + SEM from two independent experiments is shown. (C) HUVECs were transfected with the indicated siRNAs for 72 h and ICAM-1 levels analyzed by Western blot.

**Supplementary Figure 6.** (A) HUVECs were stimulated or not with TNF- $\alpha$  for 8 h, lysed and fractionated into pellet, soluble (SOL) and detergent-resistant membranes (DRMs) as in Figure 1. Fractions were immunoblotted with the indicated antibodies. (B) HUVECs were stimulated with TNF- $\alpha$  for the indicated times, mRNA was isolated and the levels of MYADM mRNA were analysed by qPCR. Graphs show the mean + SEM from three independent experiments.

siControl

siMYADM 2

siMYADM 3

actin

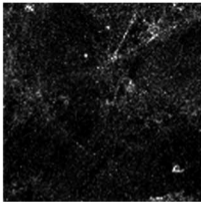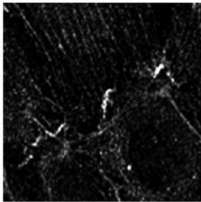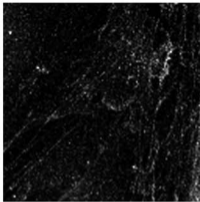

F-actin

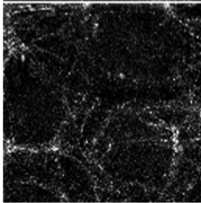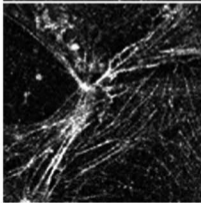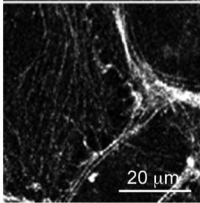

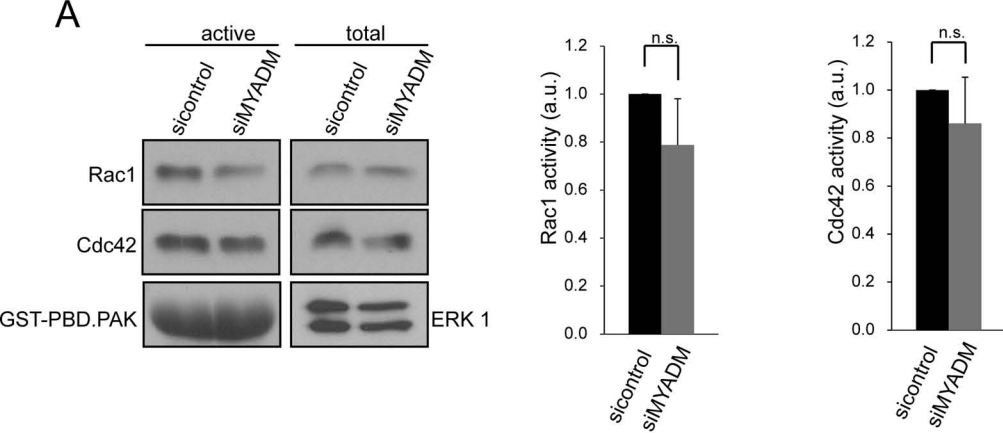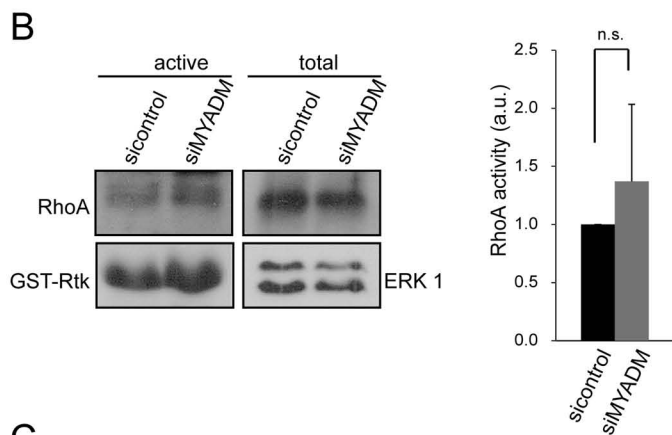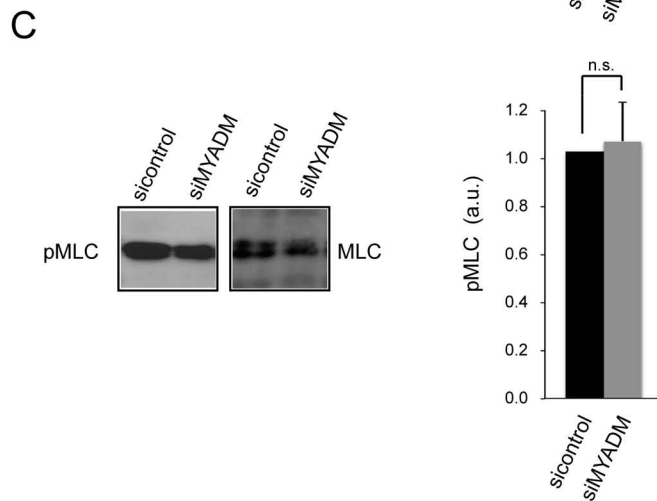

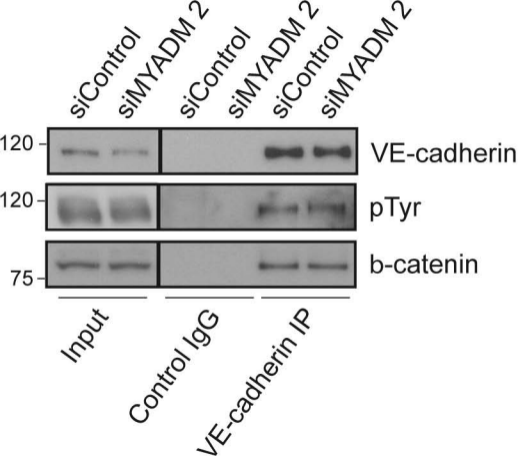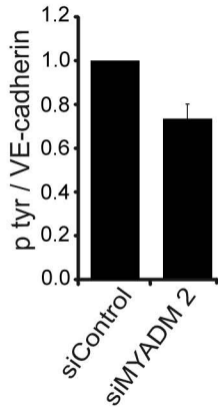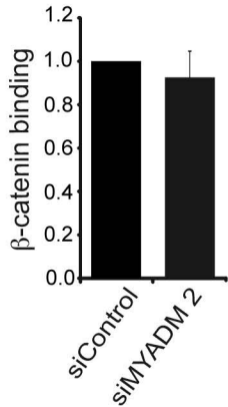

A

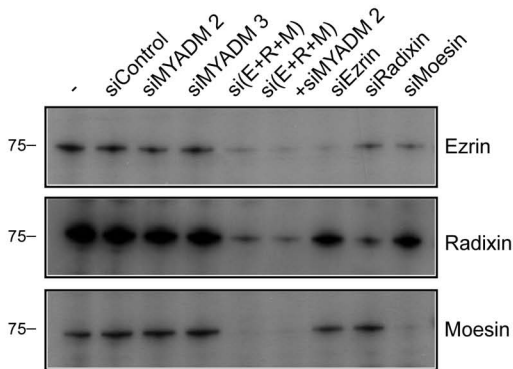

B

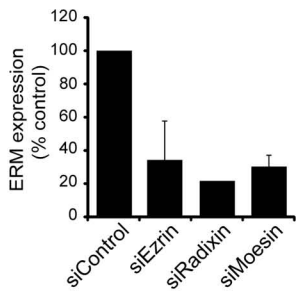

C

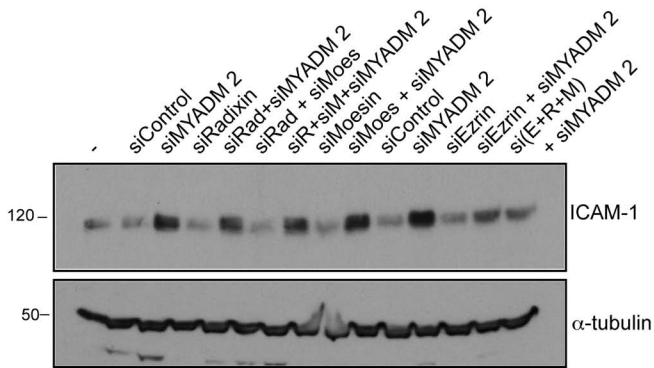

**A**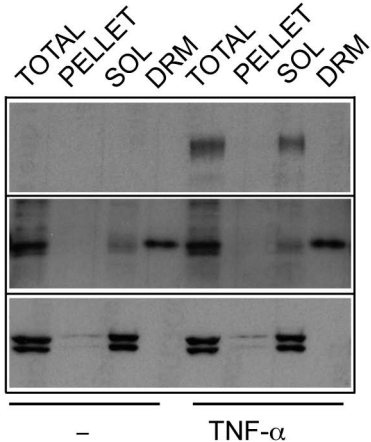**B**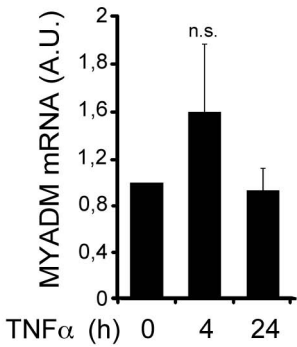

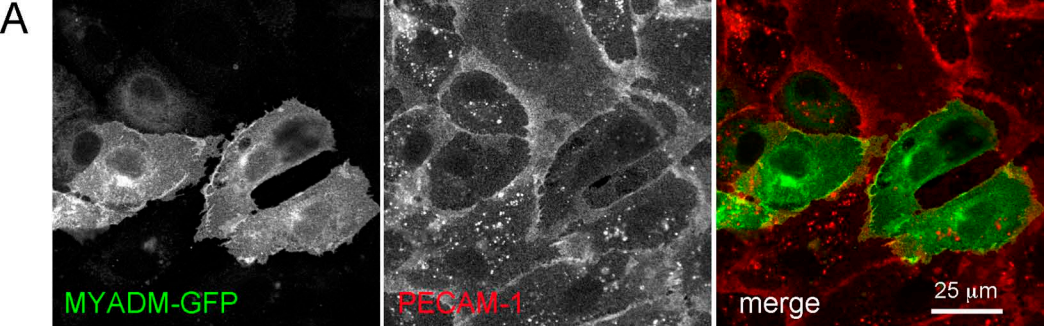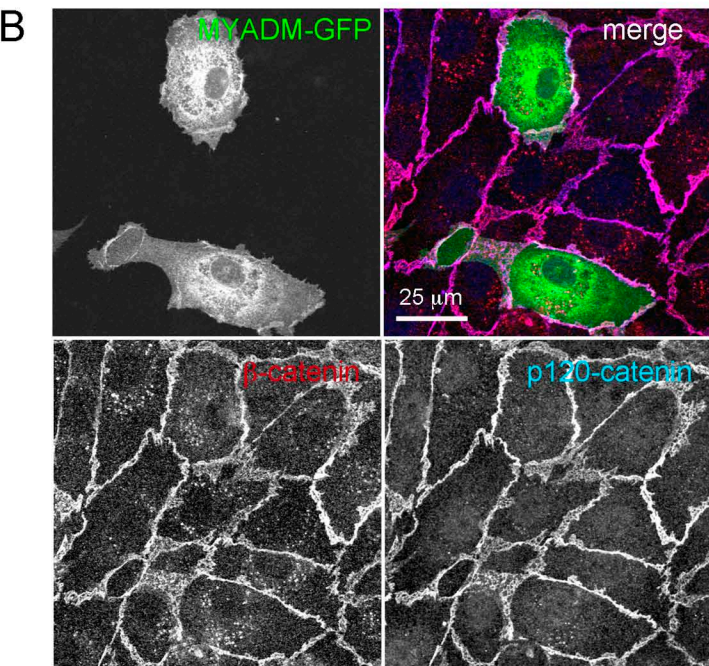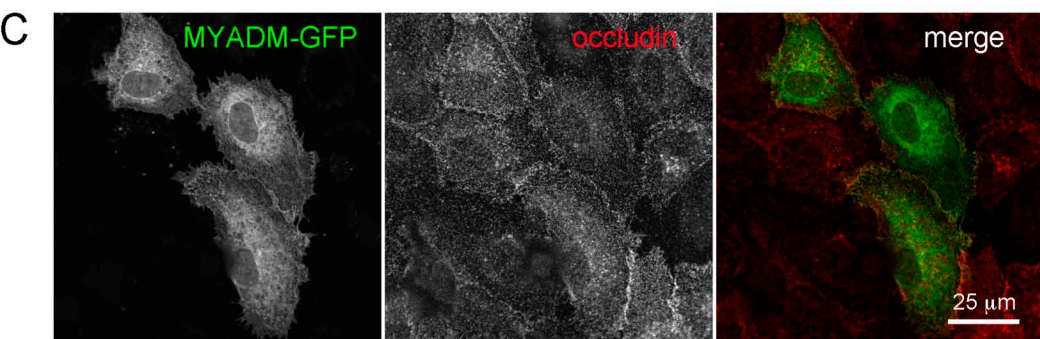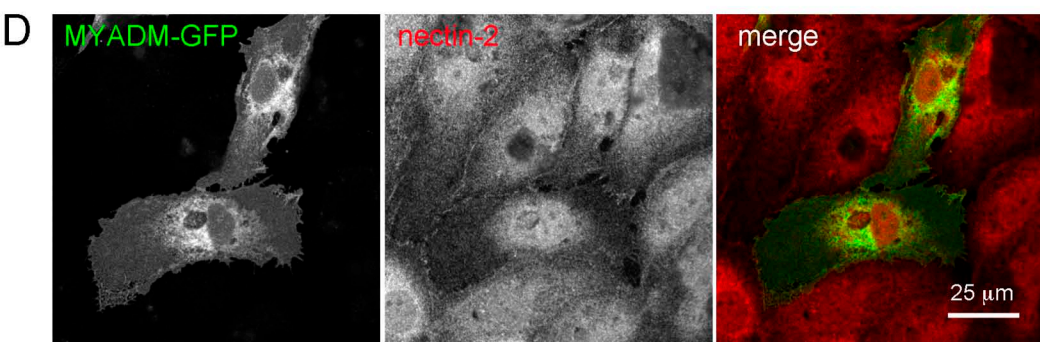

Supplement: supp_E11-11-0914v1_CombinedSupMats.pdf [file supp_E11-11-0914v1_CombinedSupMats.pdf]
